# Supplementary material for: Hydroxychloroquine Attenuates Acute Inflammation (LPS)-Induced Apoptosis via Inhibiting TRPV1 Channel/ROS Signaling Pathways in Human Monocytes
Source: MDPI journal article supplement (doi:10.3390/biology10100967), 2021-09-27
Supplement: s1 [file s1]

# **Hydroxychloroquine Attenuates Acute Inflammation (LPS)-Induced Apoptosis via Inhibiting TRPV1 channel/ROS Signaling Pathways in the human monocytes**

**Mustafa Güzel<sup>1</sup>, Orhan Akpınar<sup>2,3</sup>**

<sup>1</sup>Department of Medical Microbiology, Private Maltepe Medical Center, Istanbul, Turkey.

<sup>2</sup>Unit of Medical Microbiology, Department of Oral and Maxillofacial Surgery, Faculty of Dentistry, Suleyman Demirel University, Isparta, Turkey.

<sup>3</sup>Department of Medical Microbiology, Institute of Health Sciences, Suleyman Demirel University, Isparta, Turkey.

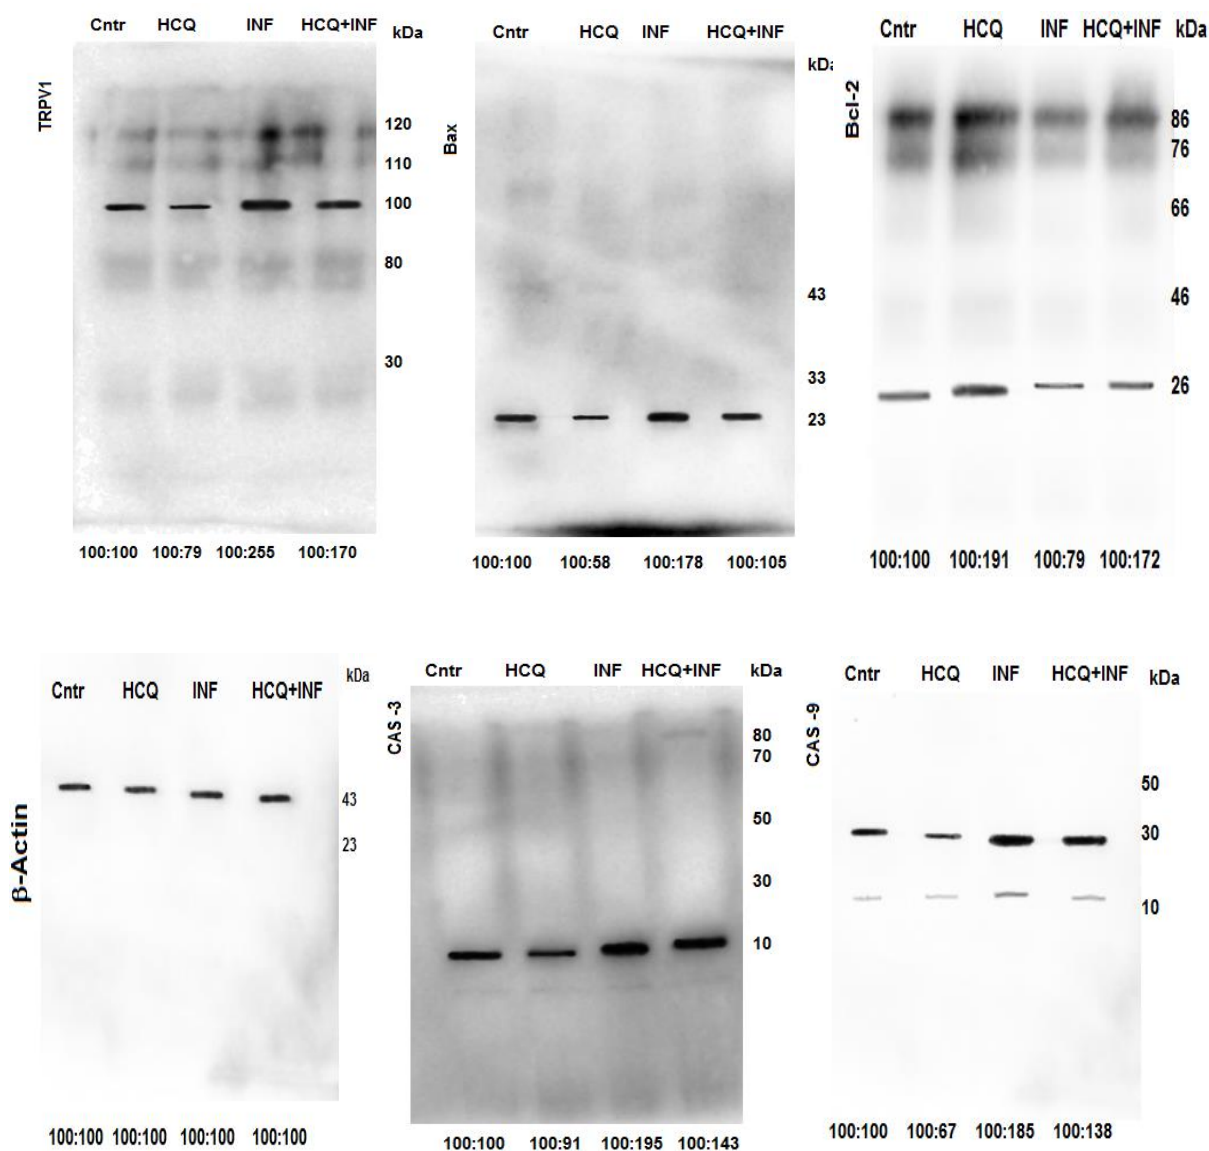

**Supplementary Figure S1. The row data of TRPV1, caspase-3 (CAS -3), caspase -9 (CAS -9), Bcl-2, and Bax in the four groups of U937 human monocyte cells.** (Mean  $\pm$  SD and  $n=3$ ). The standard western blot analysis was used for the expression of human protein levels in the cells of U937. The bands of  $\beta$ -actin protein were used as control. The dilution rates of the antibodies were kept between 1:200 and 1:1000. (b) The ratio of densitometry readings/intensity ratio were measured by using the ImageJ software, and they were normalized to the  $\beta$ -Actin protein concentration. The unit of relative density changes (% of control) were used for the expression of the results.
